# Supplementary material for: On the relationship between maxillary molar root shape and jaw kinematics in Australopithecus africanus and Paranthropus robustus
Source: R Soc Open Sci. 2018 Aug 29;5(8):180825. doi: 10.1098/rsos.180825 (PMC6124107; doi:10.1098/rsos.180825)
Supplement: Table S4 [file rsos180825supp4.xls]

## Sheet: Sheet1
0	ID	TAXON	RawCoord1	RawCoord2	RawCoord3	RawCoord4	RawCoord5	RawCoord6	RawCoord7	RawCoord8	RawCoord9	RawCoord10	RawCoord11	RawCoord12	RawCoord13	RawCoord14	RawCoord15	RawCoord16	RawCoord17	RawCoord18	RawCoord19	RawCoord20	RawCoord21	RawCoord22	RawCoord23	RawCoord24
PAN	1940_1192_PANM	PAN	101	99.5	173	101	104	176	97.3	102	179	95.9	94.9	175	96.9	101	173	91.4	107	161	91.1	107	166	88.4	103	163
PAN	1947_0051_PANM	PAN	44.7	95.7	154	40.9	94.7	158	45.5	94.1	161	50.3	94.4	156	44.9	91.3	155	40.5	84	149	42.4	84.4	153	49.2	83.7	148
PAN	1952_0144_PANM	PAN	42.7	105	158	38.8	103	164	43.8	102	168	48.6	103	163	43.2	100	162	40.1	93.5	156	42.1	93.2	162	47.6	92.5	157
PAN	1962_1477_PANM	PAN	85.7	43.6	141	89.5	39.8	142	90.4	43.2	146	86.6	47.9	146	90	45.3	141	93.7	46.1	132	96.4	47	138	92.1	54.5	138
PAN	2007_1449_PANM	PAN	48.1	70.3	65.8	43.5	73.6	61.9	48.7	75	59.2	53	72.5	63	48.3	75.1	64.2	44.6	79.1	70.5	47.4	80.9	65.4	54	80.1	69.9
PAN	1940_0467_PANF	PAN	45.9511	82.3605	158.332	41.7177	80.2574	161.77	46.4397	78.6575	164.906	51.2463	80.6426	160.498	46.0866	78.5227	159.399	41.9751	74.3666	152.075	42.7265	72.2147	154.458	50.8508	72.4264	150.076
PAN	1947_0149_PANF	PAN	36.5853	49.4255	-154.041	33.1526	50.5234	-158.123	37.906	51.6713	-161.801	42.1935	50.1991	-158.49	37.1121	53.6377	-157.042	34.4333	60.375	-150.835	35.6053	61.525	-155.811	42.7372	63.0047	-151.784
PAN	1947_0224_PANF	PAN	37.0228	101.296	157.197	33.624	98.9518	162.324	38.3429	99.7001	164.961	43.0194	101.462	158.879	38.224	96.8705	159.487	35.6212	90.8721	154.6	36.8973	89.5858	159.03	43.5692	90.9895	154.384
PAN	1962_1481_PANF	PAN	92.3591	55.1533	146.71	96.6653	56.5392	150.88	91.7134	56.507	155.242	87.3734	54.7969	150.721	92.3234	58.1683	150.293	93.7325	64.9224	145.369	93.6946	65.3237	150.381	84.3004	65.4629	145.485
PAN	1982_0002_PANF	PAN	85.0557	75.9627	159.517	88.7647	78.944	163.716	83.7125	80.6035	166.308	78.7089	77.4732	162.238	83.6048	81.0087	159.846	87.141	83.0735	156.316	86.351	86.5338	158.083	77.9254	86.1397	153.877
PAN	0000_A116_PANM	PAN	46.8519	72.1264	-171.153	42.5649	73.5367	-175.485	47.5921	75.0609	-177.847	52.0813	73.2082	-174.31	45.9491	77.1149	-172.94	41.8467	81.4455	-166.103	43.8445	83.1274	-171.619	50.6045	83.8789	-166.459
GOR	1906_0441_GORM	GOR	64.7	121	247	57.3	116	253	63.5	113	258	71.1	116	251	64.6	112	249	57.2	105	235	60.9	101	242	79.4	106	239
GOR	1929_0503_GORM	GOR	98.8	131	95	99.4	139	89.2	103	134	82	104	124	89.7	105	133	90.7	115	139	103	116	139	98.2	119	126	100
GOR	1939_0438_GORM	GOR	49.6	109	-71.6	44.5	105	-66.4	49.8	102	-61.2	57.2	105	-67.8	50.1	103	-68.9	47.1	95.3	-79.4	47.7	92.1	-72.1	60.9	94.3	-76.3
GOR	1949_0524_GORM	GOR	129	131	79.4	134	128	72.9	126	127	67	120	129	74.7	128	126	75.4	132	112	86	129	112	79.3	114	112	86.4
GOR	1987_0250_GORM	GOR	69.8	117	246	64.9	114	251	71.1	110	256	77.9	112	250	71.2	110	248	66.3	106	240	66.4	102	245	76.8	100	238
GOR	1933_0075_GORF	GOR	45.8672	99.9282	185.245	41.9319	97.1341	190.353	48.6674	94.7457	194.1	54.3023	96.42	188.502	47.9948	94.2718	187.384	42.5228	86.8158	179.389	42.537	84.9512	185.492	56.4787	84.6463	175.648
GOR	1936_1985_GORF	GOR	101.931	86.697	191.228	107.36	87.624	196.02	102.805	90.903	201.52	95.8023	89.6715	194.567	102.823	91.252	194.866	104.611	101.5	183.262	105.789	101.091	190.078	92.1324	102.025	182.868
GOR	1962_1496_GORF	GOR	99.1185	111.741	73.7289	103.89	109.952	67.6484	98.2835	107.603	63.6905	93.1537	108.756	69.6517	98.765	107.4	70.5937	105.58	100.112	79.9689	103.232	97.4538	74.4086	89.4429	96.1905	79.7077
GOR	1963_0276_GORF	GOR	56.3957	109.493	190.758	51.6206	106.654	197.32	58.7153	106.257	202.07	64.0888	108.416	195.032	56.5994	104.22	195.721	52.9356	96.752	188.527	53.6468	95.4868	195.724	67.1185	96.7058	189.483
GOR	1940_0373_GORF	GOR	59.0872	85.2329	198.615	53.7222	81.1761	204.16	60.9406	77.8559	207.939	66.6035	82.6362	200.186	58.9686	79.0956	199.83	53.4258	73.8805	186.09	55.2271	71.1545	192.716	69.8416	72.5089	186.127
TM1511	TM1511	AFRO	25.4376	15.9153	21.0011	32.7508	19.3509	23.7831	26.7824	22.2895	28.2853	20.2367	19.5384	26.2258	25.6723	21.9555	21.5934	29.2888	24.8127	10.1776	30.7684	28.8265	15.5448	15.5818	26.8891	17.891
TM1512	TM1512	AFRO	5.39148	16.6946	37.8946	7.63879	10.3106	40.3414	12.5893	15.0747	44.9964	10.6836	22.1398	43.0234	10.7506	17.1409	39.9049	12.5881	10.4787	28.2567	16.5061	11.4192	31.9926	19.9707	24.0316	33.2468
Sts12	Sts12	AFRO	9.6374	33.1668	41.6575	6.99273	36.0062	45.8078	11.1751	39.7099	49.1397	14.4742	39.7603	42.3617	13.4038	34.2377	45.8255	13.5646	24.9965	48.6081	16.4221	26.3996	49.5028	24.8038	30.0385	41.9349
Sts52a	Sts52a	AFRO	52.9237	80.7048	77.3824	49.0766	86.8693	81.8241	44.0992	80.2743	82.6745	48.8554	73.6118	80.3136	46.913	79.4358	76.5187	46.8358	88.5546	67.1444	43.0829	87.7168	70.4532	43.3033	74.7031	65.6328
Sts71	Sts71	AFRO	-27	35.8	36.7	-24.7	36.7	30.6	-30	31.1	28.9	-33.4	28.5	35.6	-26.3	29.6	34.3	-15.1	30	37.3	-17.9	28.1	32.8	-26.7	18.4	38.4
Stw183	Stw183	AFRO	60.4958	33.3391	17.0751	61.0063	40.1588	21.4797	67.3326	34.575	26.0031	66.2237	27.5725	20.7684	60.8475	30.8338	23.5058	47.5054	34.1531	23.3554	51.289	33.4681	28.4365	55.759	19.1231	26.797
Stw498a	Stw498a	AFRO	8.83175	33.439	52.251	4.02428	30.1994	58.8796	12.4362	26.8206	59.7878	17.3653	32.4667	54.2769	12.2901	28.398	53.4539	1.12166	25.547	46.419	6.81596	18.6667	50.4947	21.6358	24.0643	45.3364
Sts8	STS8	AFRO	13.4921	13.1441	11.4983	16.9643	20.0691	9.19092	21.6057	14.8396	5.69472	18.1633	7.94735	8.03952	19.0837	13.0667	11.2897	19.9164	19.8999	21.1816	23.7155	19.7549	20.0728	24.7642	6.89165	20.641
Sts53	STS53	AFRO	7.35495	8.30298	14.9172	12.7362	7.14266	19.0442	10.2938	13.9525	22.6839	4.3985	15.8842	18.2356	10.8579	14.3074	14.8525	18.4206	14.0935	5.09367	19.0048	17.9133	10.0991	7.43038	25.0332	9.13346
Stw13	STW13	AFRO	15.2213	16.3654	27.6297	22.7357	16.1055	33.1731	20.2985	23.7549	33.0011	13.4725	22.8625	29.8724	20.2105	20.9811	26.9062	26.3492	17.1784	19.3821	27.6603	22.4981	18.8547	17.6625	28.5265	13.8478
Stw252	STW252	AFRO	18.3888	34.4877	50.6371	13.9677	42.4569	46.7305	22.3597	45.3839	47.2749	26.4688	39.028	49.5189	21.7832	40.6791	52.057	13.7649	41.5141	59.2198	14.1527	46.8231	57.7659	27.9932	43.1238	63.0459
Stw283	STW283	AFRO	10.6298	11.0267	8.55676	8.27375	18.984	10.9682	16.4471	19.4373	12.6359	18.8638	10.8315	9.44516	13.1753	13.0823	12.9933	2.01785	10.1105	20.607	7.02516	11.8606	21.4509	20.116	1.23664	20.5661
MLD6	MLD6	AFRO	10.1922	19.3905	25.2063	5.84003	14.0656	29.5274	13.0555	11.442	30.8823	17.2814	16.2794	27.5452	12.5181	12.9544	24.8204	5.6313	10.0196	18.329	6.50933	7.27966	20.9166	19.773	9.96368	16.7503
MLD9	MLD9	AFRO	11.1472	13.8802	10.2087	4.42779	20.4572	8.77327	11.7093	21.3514	3.09952	15.9635	16.5553	4.72064	13.7267	19.0276	10.7111	8.64453	22.0903	22.5785	11.0352	26.7452	19.9782	26.2202	19.7952	12.8508
SK13.14	SK13.14	ROBO	11.9968	35.4492	49.4133	10.2829	42.7181	55.1125	13.7743	45.3598	46.8251	15.4241	38.5331	43.0045	15.765	38.9834	49.8161	21.6219	33.5006	65.2804	26.1437	39.481	60.7877	32.0533	32.2352	46.9133
SK48	SK48	ROBO	13.0728	18.9246	15.9857	16.2197	22.9629	10.1588	15.7185	16.0198	6.77513	12.9813	10.4732	12.5966	17.9559	15.106	12.7922	30.394	21.6198	20.7404	31.3263	18.837	16.058	26.6814	6.01846	20.202
SKW11	SKW11	ROBO	-11.2	30.4	31.2	-4.31	32.1	38.9	-11.1	29	41.6	-16.5	26.2	34.7	-13.4	32.4	36.1	-12.9	46.3	33	-14.9	45.9	39.5	-25.9	37.6	33
SK17	SK17	ROBO	3.69141	11.2357	8.62362	10.8877	13.9967	6.53794	11.487	4.52116	6.61459	4.80542	1.56455	8.15887	8.04672	8.4361	12.7706	9.21638	14.7605	20.8487	12.8223	12.8165	21.1567	4.95192	3.86384	24.599
SK46	SK46	ROBO	13.2285	14.9323	9.25321	6.94255	15.5485	3.92111	10.5495	19.8716	1.58859	18.6429	21.3156	5.15197	11.3917	19.942	9.85069	2.9626	21.1556	23.4849	5.34042	25.2423	19.0015	16.3862	30.8774	23.0537
SK47	SK47	ROBO	10.888	10.1739	14.8487	9.75047	13.5003	8.24982	14.1371	8.02128	6.94725	15.6525	5.01	13.7646	16.9547	12.0061	12.9915	17.9114	21.0205	16.3889	21.0743	19.9034	13.3081	26.2637	12.4798	20.0467
SK49	SK49	ROBO	23.9036	22.1671	25.4136	30.0527	28.9646	24.0717	31.1837	21.7387	17.359	24.899	17.0358	19.1079	29.4014	19.9724	24.9495	34.4391	22.1948	37.2573	39.159	19.5295	33.8925	32.583	6.0595	30.4533
SK52	SK52	ROBO	18.5753	15.081	16.0956	17.0876	24.1148	18.9302	10.4217	17.5873	22.3354	11.8368	8.88559	19.4371	12.6226	15.8241	14.5277	14.7076	23.3862	0.181302	5.25805	21.5736	5.30184	5.30693	7.78585	2.22771
SK57	SK57	ROBO	20.9921	13.4038	17.3422	17.9807	5.90521	13.3805	22.4844	10.7009	6.15642	24.289	18.6945	10.853	16.6709	15.8581	11.66	5.37408	14.9809	13.465	5.80905	15.5672	11.3824	11.2707	28.843	11.5814
SK83	SK83	ROBO	31.7735	20.4538	25.512	27.6375	24.1604	33.0477	32.0005	15.6394	34.5045	35.6594	13.2991	27.2745	28.1822	16.09	28.0893	15.3043	20.6355	22.3176	15.3762	13.6363	29.3246	22.279	3.35065	19.8624
TM1517	TM1517	ROBO	75.2116	89.3385	13.5632	72.847	97.4839	13.5531	80.7586	96.5785	11.963	81.8784	88.25	12.412	78.2153	92.0513	17.2217	73.1314	92.1255	29.701	77.5441	95.1129	28.5167	84.4175	86.7278	27.7011
SKW8	SKW8	ROBO	8.60498	13.7623	16.1313	4.67365	10.4922	9.46144	6.79488	3.20665	14.5924	11.6574	6.64941	20.8319	11.2033	8.8039	13.0556	20.8138	17.1374	1.79513	20.5761	9.15128	3.09664	27.5117	8.06534	10.9124
KNM-WT17400	KNM-WT17400	BOIS	12.4	20.26	36.09	9.91	13.51	41.68	13.1	19.51	45.9	14.66	25.94	39.31	14.58	18.52	39.9	24.49	6.07	30.54	25.71	8.23	39.11	33.21	22.22	33.69
KNM-CH1	KNM-CH1	BOIS	42.18	68.98	17.24	38.4	74.35	23.62	42.84	67.25	27.65	46.55	63.16	21.77	39.21	66.91	22.15	22.17	65.92	15.98	25.6	62.56	24.03	31.88	49.93	17.74
OH5	OH5	BOIS	-29.4	-5.31	-73.64	-37.08	3.09	-74.86	-27.54	6.61	-74.52	-20.21	-1.79	-73.64	-28.29	0.79	-70.23	-37.75	-1.25	-52.39	-34.93	6.34	-54.63	-17	-0.76	-51.55
